# Supplementary material
Source: PubMed Central journal article supplement (PMC8640841)
Supplement: pnas.2112107118.sapp.pdf [file pnas.2112107118.sapp.pdf]

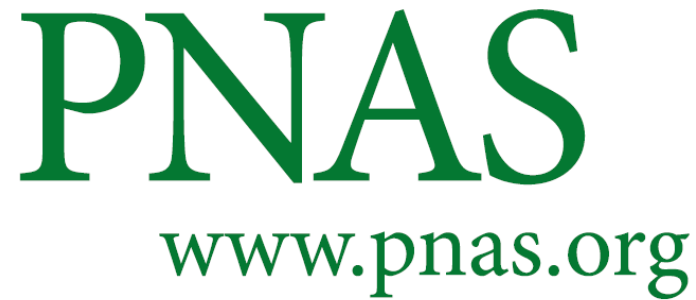

**Supplementary Information for**

**Actinobacteria challenge the paradigm:**

**a unique protein architecture for a well-known central metabolic complex**

Eduardo M. Bruch, Pierre Vilela, Lu Yang, Alexandra Boyko, Norik Lexa-Sapart,

Bertrand Raynal, Pedro M. Alzari, Marco Bellinzoni

Correspondence to E.M. Bruch and M. Bellinzoni  
Email: [eduardobruch@gmail.com](mailto:eduardobruch@gmail.com) and [marco.bellinzoni@pasteur.fr](mailto:marco.bellinzoni@pasteur.fr)

**This PDF file includes:**

Figures S1 to S15  
Tables S1 to S4  
SI References

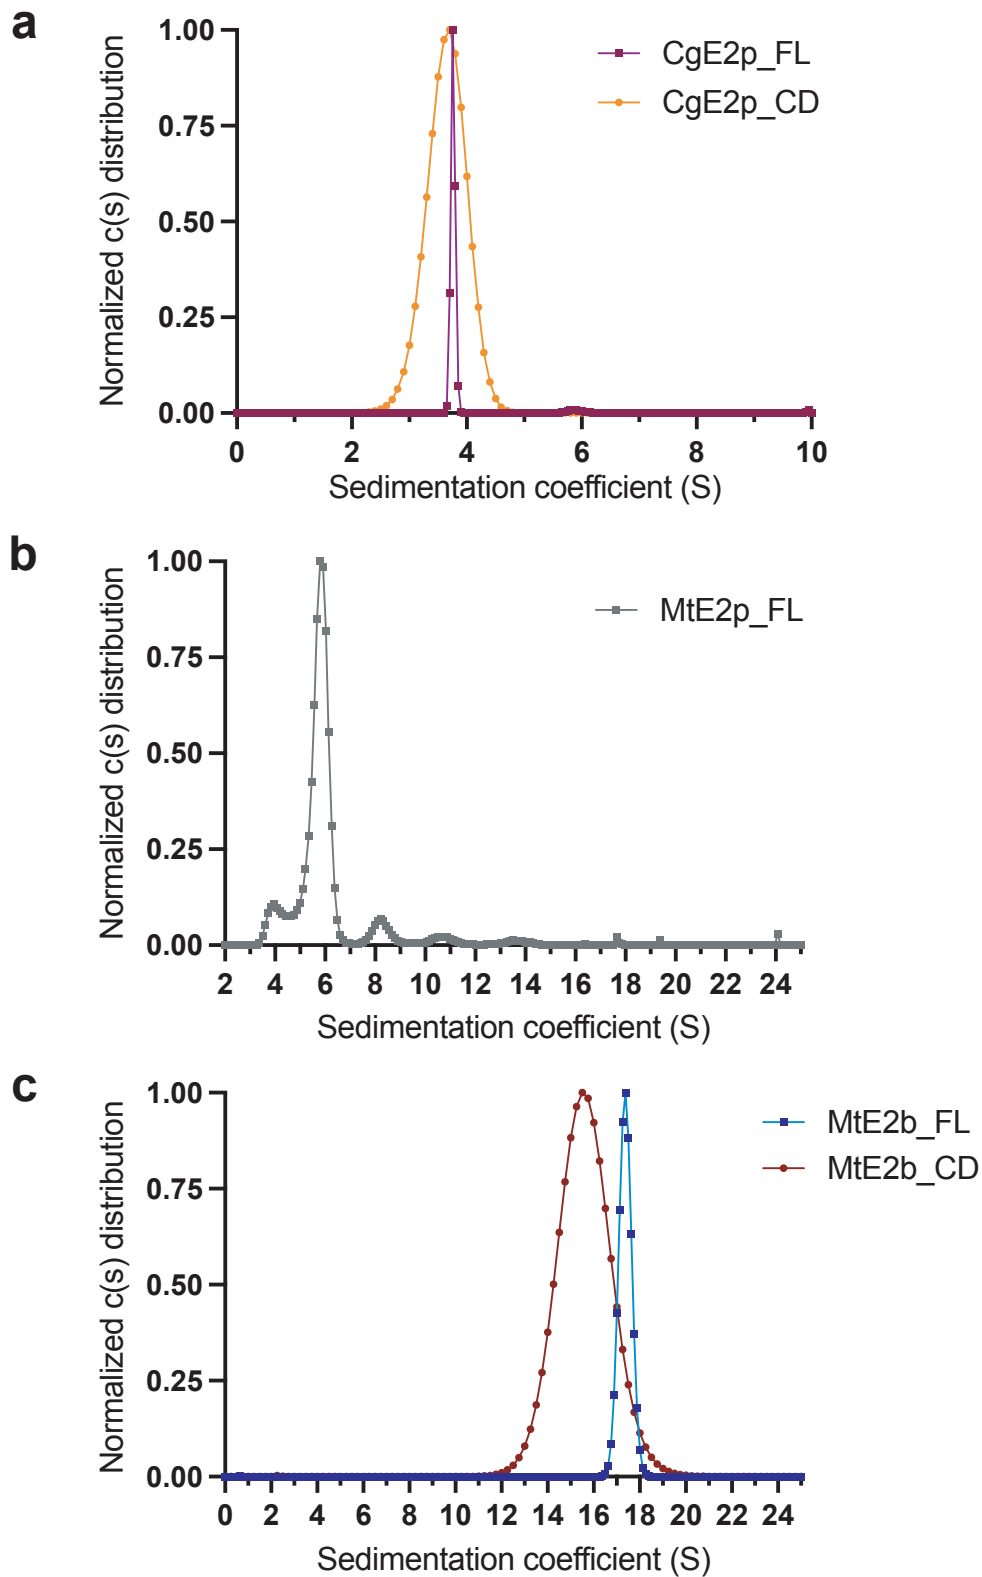

**Figure S1. Analytical ultracentrifugation profiles.**

Normalized sedimentation coefficient distributions  $c(s)$  are shown for each of the studied samples: **a)** CgE2p\_FL (violet) vs. CgE2p\_CD (orange); **b)** MtE2p\_FL (grey); **c)** MtE2b\_FL (blue) vs. MtE2b\_CD (brown). Molecular mass estimations are provided in Table 1.

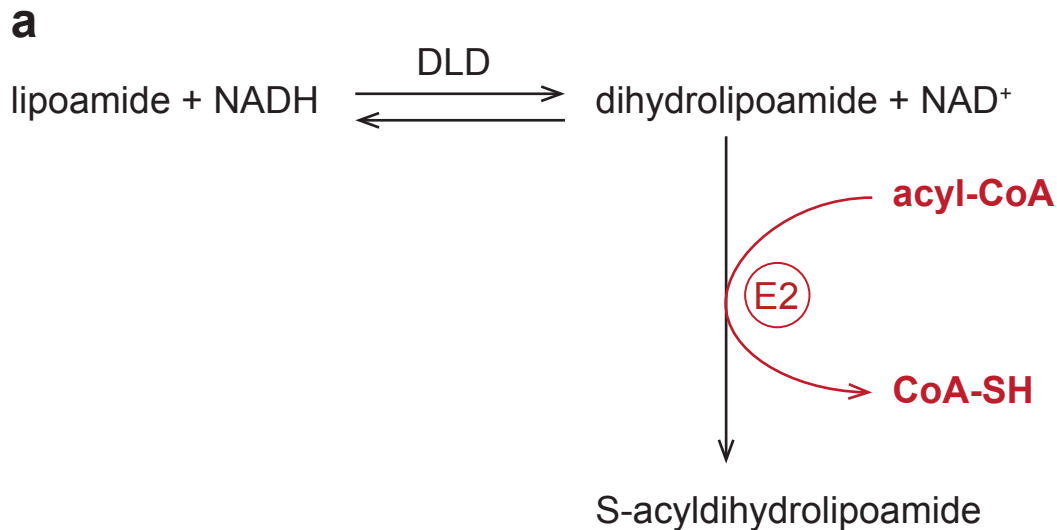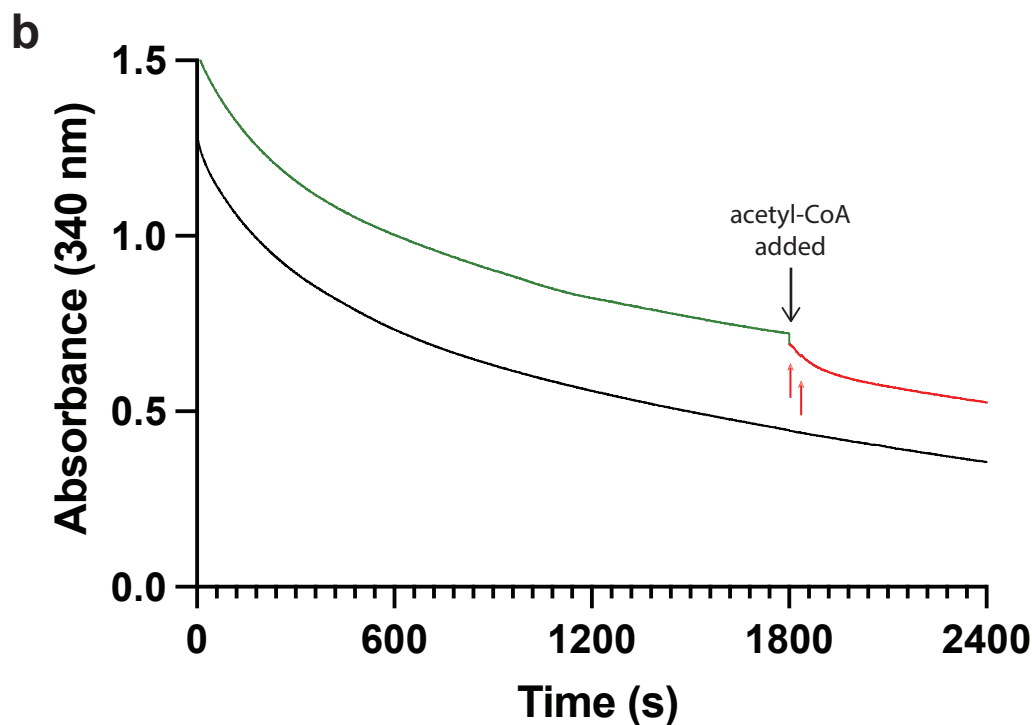

**Figure S2. Transacylase assay.**

**a)** Schema of the transacylase activity assay from the work by Hall and Weitzman (1). The assay measures the backward conversion of acyl-CoA to CoA-SH in the presence of dihydrolipoamide, in turn generated by commercial bovine dihydrolipoamide dehydrogenase (DLD) through a reversible reaction in the presence of oxidized lipoamide and NADH. Acetyl-CoA was provided as substrate in the case of *CgE2p* and *MtE2p*, while isobutyryl-CoA was employed for *MtE2b* (see Materials and Methods). **b)** Representative trace of an absorbance measurement performed on *CgE2p\_FL*. After 30 min preincubation to reach a linear NADH consumption rate (green curve), the addition of 0.15 mM acetyl-CoA triggered the E2p catalyzed transacylase reaction (red). The red arrows beneath indicate the initial, linear range in absorbance decrease that was considered for further calculations, typically in the 1 min range. All assays were performed in triplicates; the background NADH consumption rate was then subtracted to infer substrate conversion rate and E2p specific activities. The black curve represents a negative control measurement where no acetyl-CoA was provided.

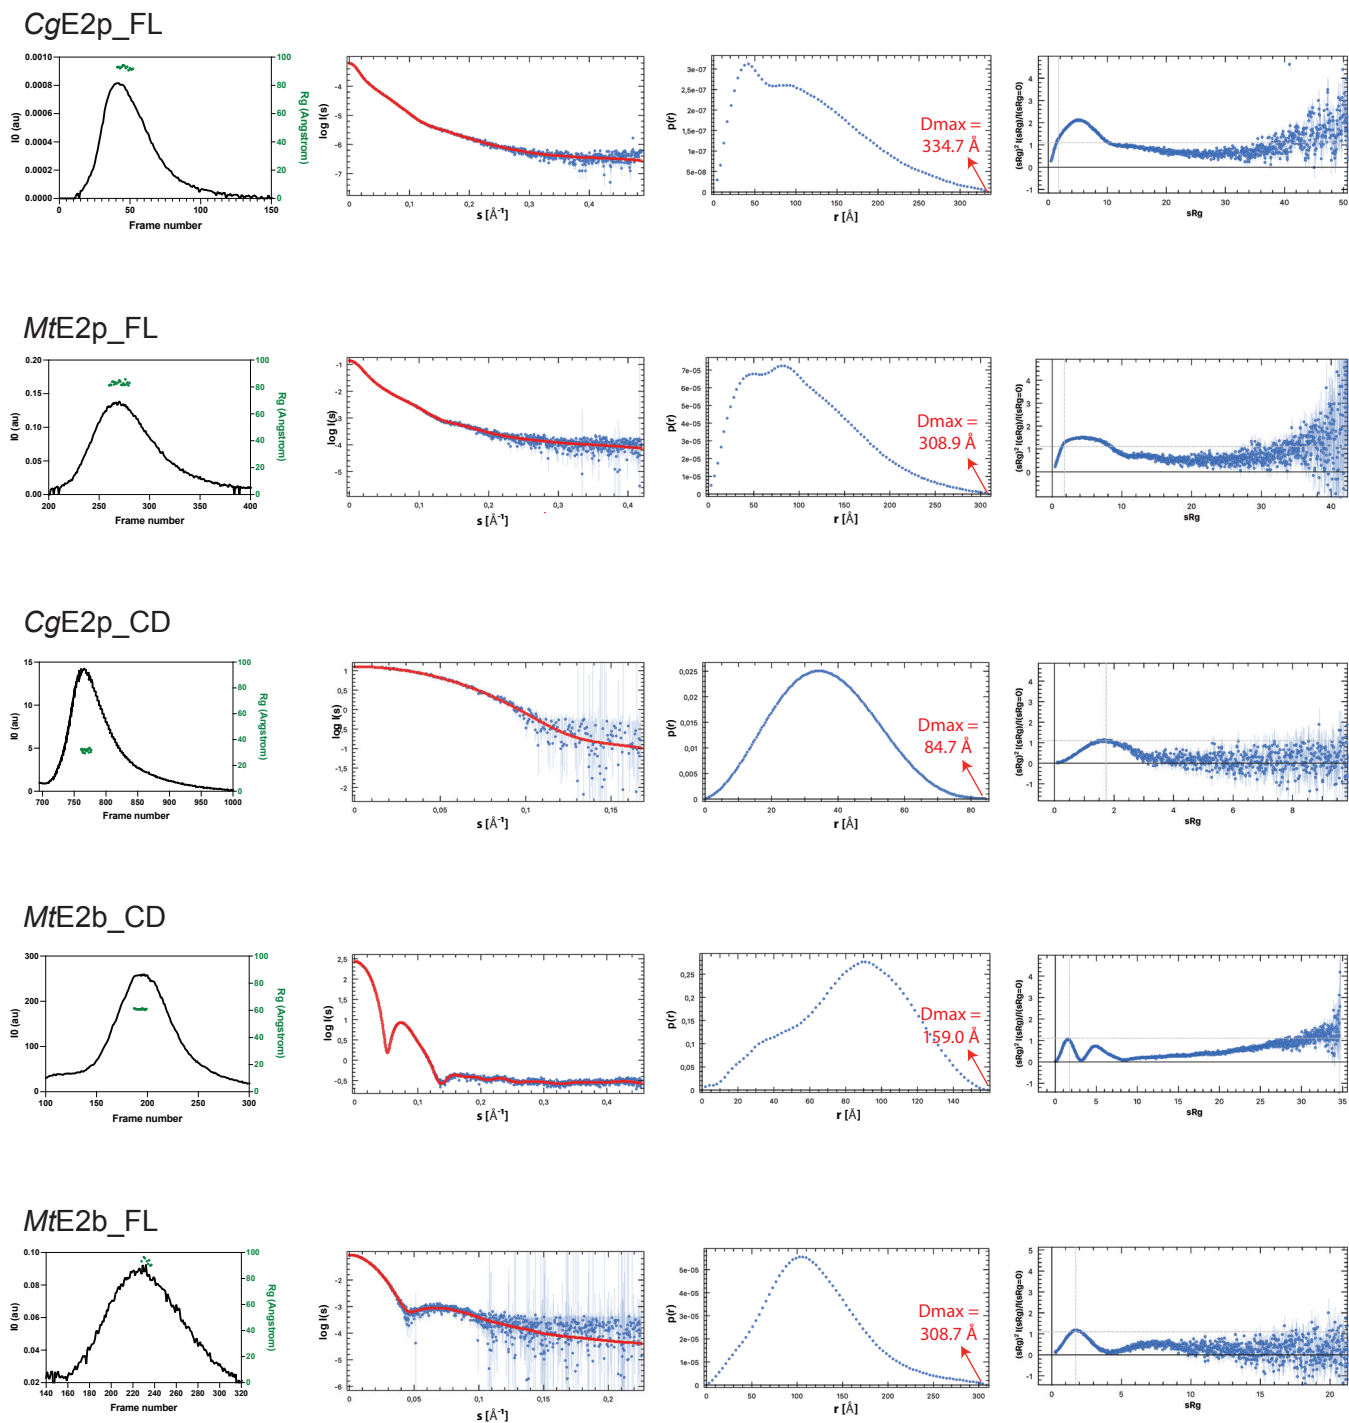

**Figure S3. SAXS primary data analysis.**

From left to right: scattering intensity per recorded frame (black) and extrapolated  $R_g$  (green); experimental scattering intensity (blue) and corresponding fitting curve (red); pair distance distribution function showing the estimated  $D_{\text{max}}$  values; dimensionless Kratky plot. In the latter, dashed lines indicate the position where a globular protein maximum is predicted to be located ( $sR_g = \sqrt{3}$  and  $(sR_g)^2 I(s)/I(0) = 1.104$  (2,3)).



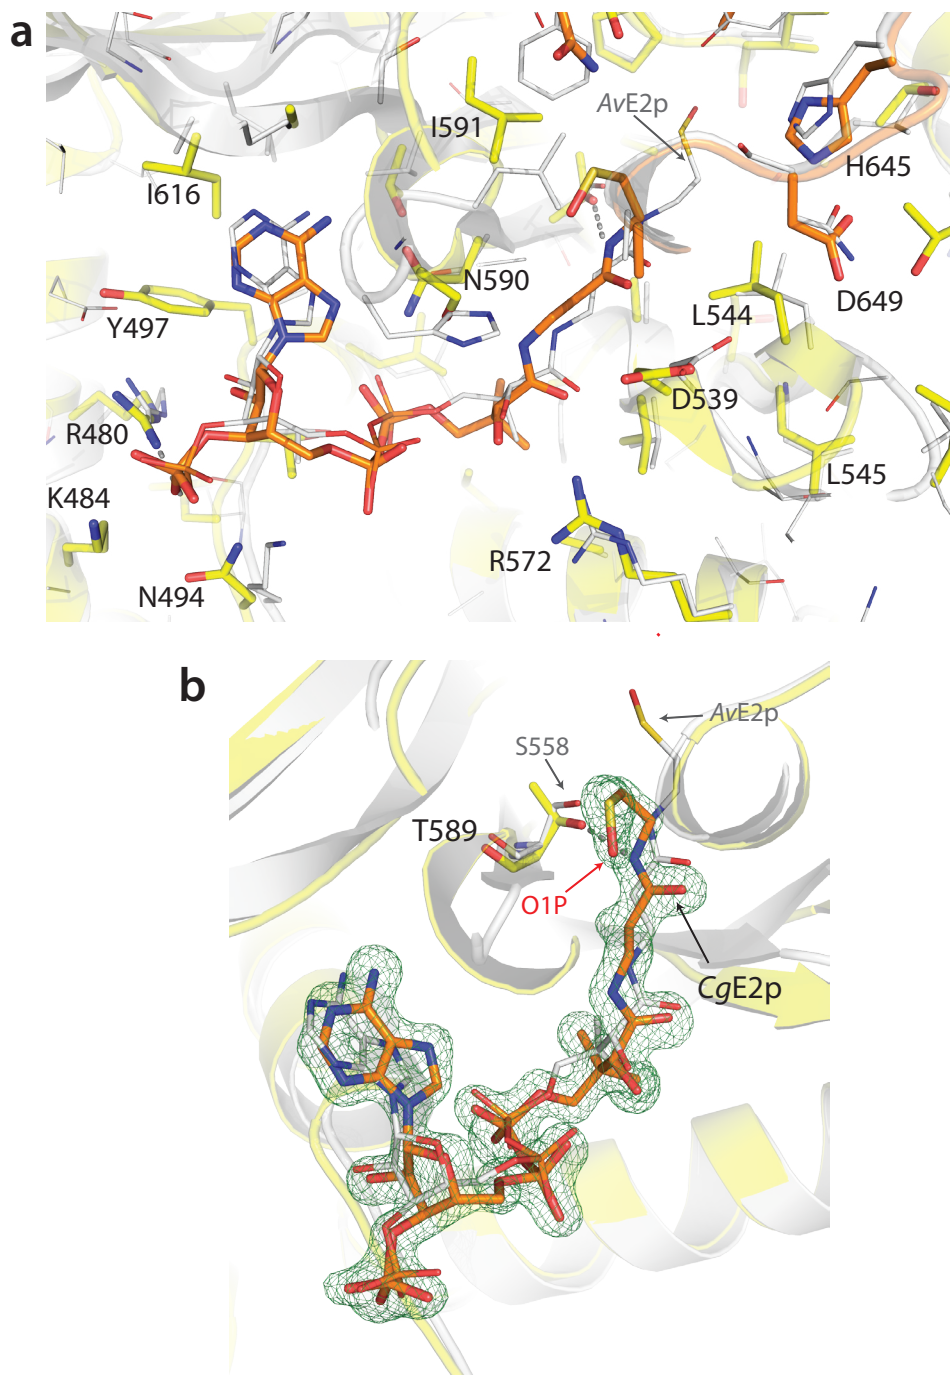

**Figure S4. Comparison of the bound CoA conformation within the active site of CgE2p\_CD and AvE2p\_CD.**

**a)** Superposition of CgE2p (yellow) and AvE2p (gray) active sites. Residue numbering corresponds to CgE2p. The CoA ligand is visible in the center (orange for CgE2p and gray for AvE2p). **b)** CoA binding site, showing the ligand density for CoA bound to CgE2p ('polder' omit map (4) contoured at the  $4\sigma$  level, in blue). The terminal thiol group of CoA is found in a non-equivalent position to AvE2p\_CD (5), and rather points to the opposite direction due to a reorientation of the cysteamine moiety close to  $180^\circ$  around N4P. Furthermore, the hydroxyl group of Thr589 (equivalent to Ser558 in AvE2p\_CD) can form a H-bond with the N4P atom from CoA to stabilize the negatively charged tetrahedral intermediate. Fourier difference electron density maps are compatible with the presence of an oxygen atom at covalent binding distance ( $1.7 \text{ \AA}$ ) from the CoA sulfur (O1P; red arrow), suggesting the presence of, at least, a partial oxidation of the CoA thiol group to sulfenic acid (PDB 6ZZJ, this work), as observed in the AvE2p\_CD complex (PDB 1EAD) (5).

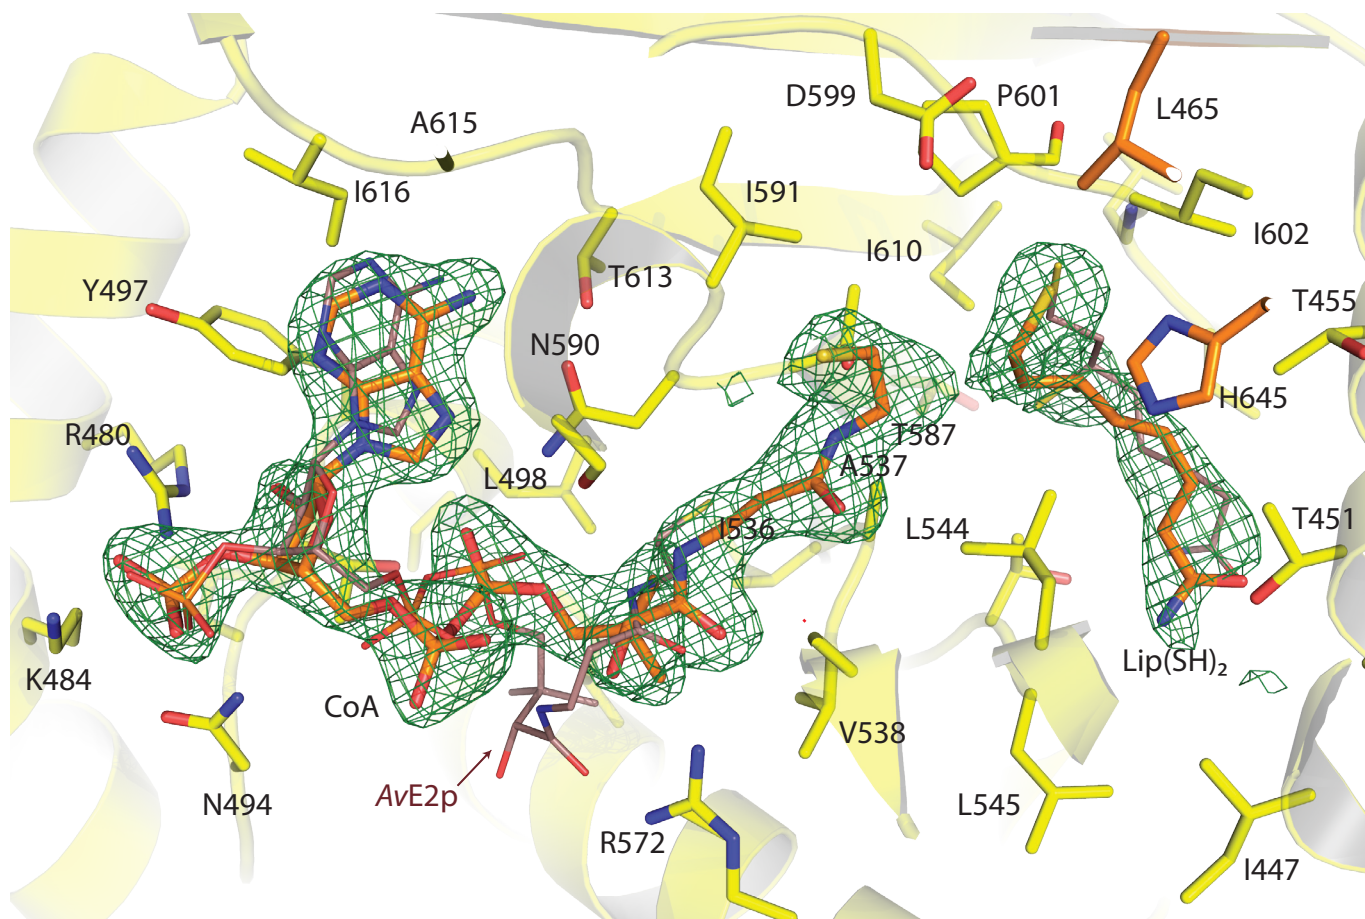

**Figure S5. Comparison of the ternary complex from CgE2p\_CD and AvE2p\_CD.**

Superposition of the ternary complex obtained for CgE2p (PDB 6ZZK) and AvE2p with CoA and lipoamide (PDB 1EAB) (5). CgE2p is depicted in yellow, side chains of active site residues are shown as sticks (and numbered), while ligands are depicted with orange carbons. The green mesh represents the 'polder' omit map (4) contoured at the  $4\sigma$  level. The AvE2p ligands are displayed as thinner, brown sticks (protein atoms from the AvE2p enzyme are not shown). For AvE2p\_CD, the ternary complex with CoA and Lip(SH)<sub>2</sub> presented CoA with an abortive, 'OUT' conformation in which the pantetheine chain did not reach the active site cleft but rather formed a left-handed helix with a series of intramolecular H-bonds (PDB 1EAB) (5). In the corynebacterial enzyme, despite a not strictly equivalent pose, Lip(SH)<sub>2</sub> makes active site interactions analogous to the ones reported in the case of AvE2p\_CD, most notably the H-bond between the reactive sulphur (S8) and His645' provided by the opposite monomer, while the other sulphur atom (S6) is engaged in an H-bond with the carbonyl oxygen of Ile602, another conserved residue. The amide moiety is stabilized by H-bonds involving Thr451, the carbonyl group of Leu544 and the hydroxyl of a Ser residue preceding Leu437, left over from TEV digestion of the N-terminal His<sub>6</sub> affinity tag and forming crystal packing interactions. The other CgE2p\_CD monomer in the asymmetric unit, which forms a separate homotrimer via a crystallographic 3-fold axis, does not show any dihydrolipoamide bound, but a CoA molecule in the same orientation as the other protomer, and forming exactly the same interactions described before.

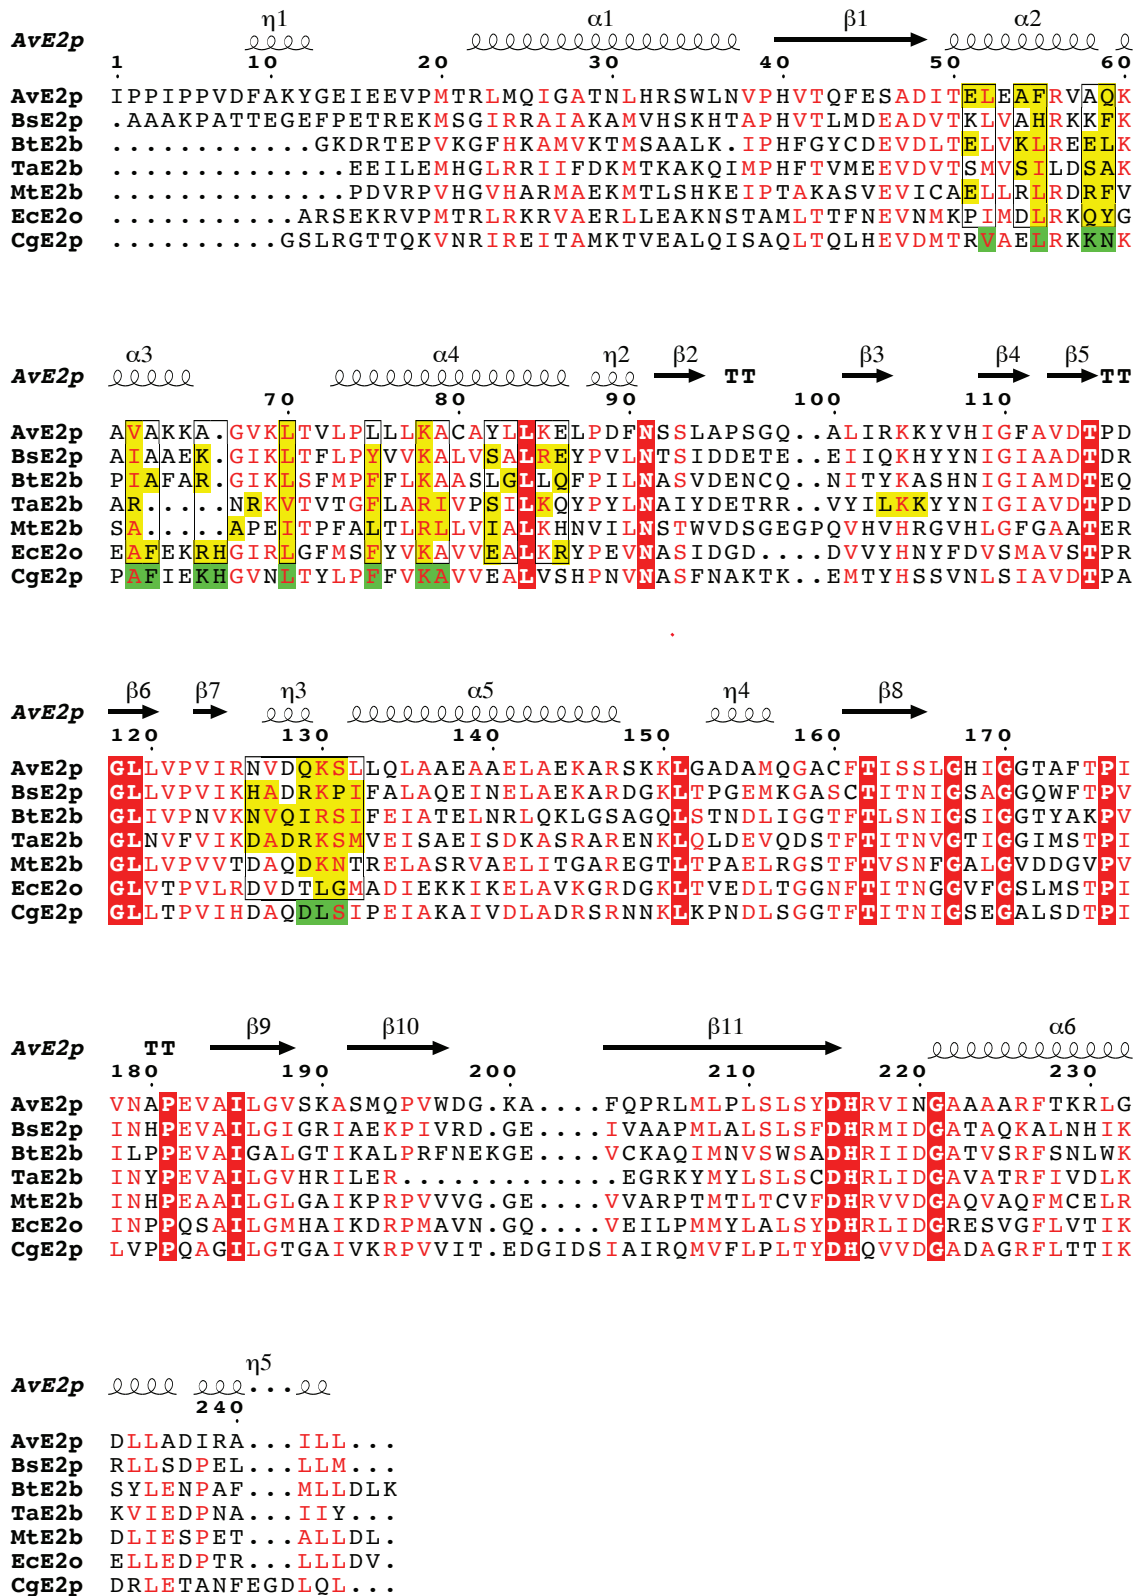

**Figure S6. Sequence alignment of E2 catalytic domains of known structure.**

Aligned sequences include: *A. vinelandii* E2p (AvE2p, PDB 1EAB); *B. stearothermophilus* E2p (BsE2p, PDB 1B5S); *Bos taurus* E2b (BtE2b, PDB 2I14); *T. acidophilum* E2b (TaE2b, PDB 3RQC); *M. tuberculosis* E2b (MtE2b, PDB 6ZZN - this work); *E. coli* SucB/E2o (EcE2o, PDB 1SCZ); *C. glutamicum* E2p (CgE2p, PDB 6ZZI - this work). Highlighted in yellow, residues involved in the TTI helix interactions, as determined by PISA (6) ([https://www.ebi.ac.uk/msd-srv/prot\\_int/cgi-bin/piserver](https://www.ebi.ac.uk/msd-srv/prot_int/cgi-bin/piserver)); boxes show regions involved in these interactions in at least two sequences. In the case of BsE2p only, a new model was generated by Swiss model (7) (<https://swissmodel.expasy.org/interactive>) starting from PDB 1B5S, in order to complete the coordinate set with the missing side chain atoms. As a reference, secondary structure features and residue number of AvE2p (PDB 1EAB) (5) were superimposed. Figure generated by ESPrpt3 (8) (<http://esprpt3.ibcp.fr>).



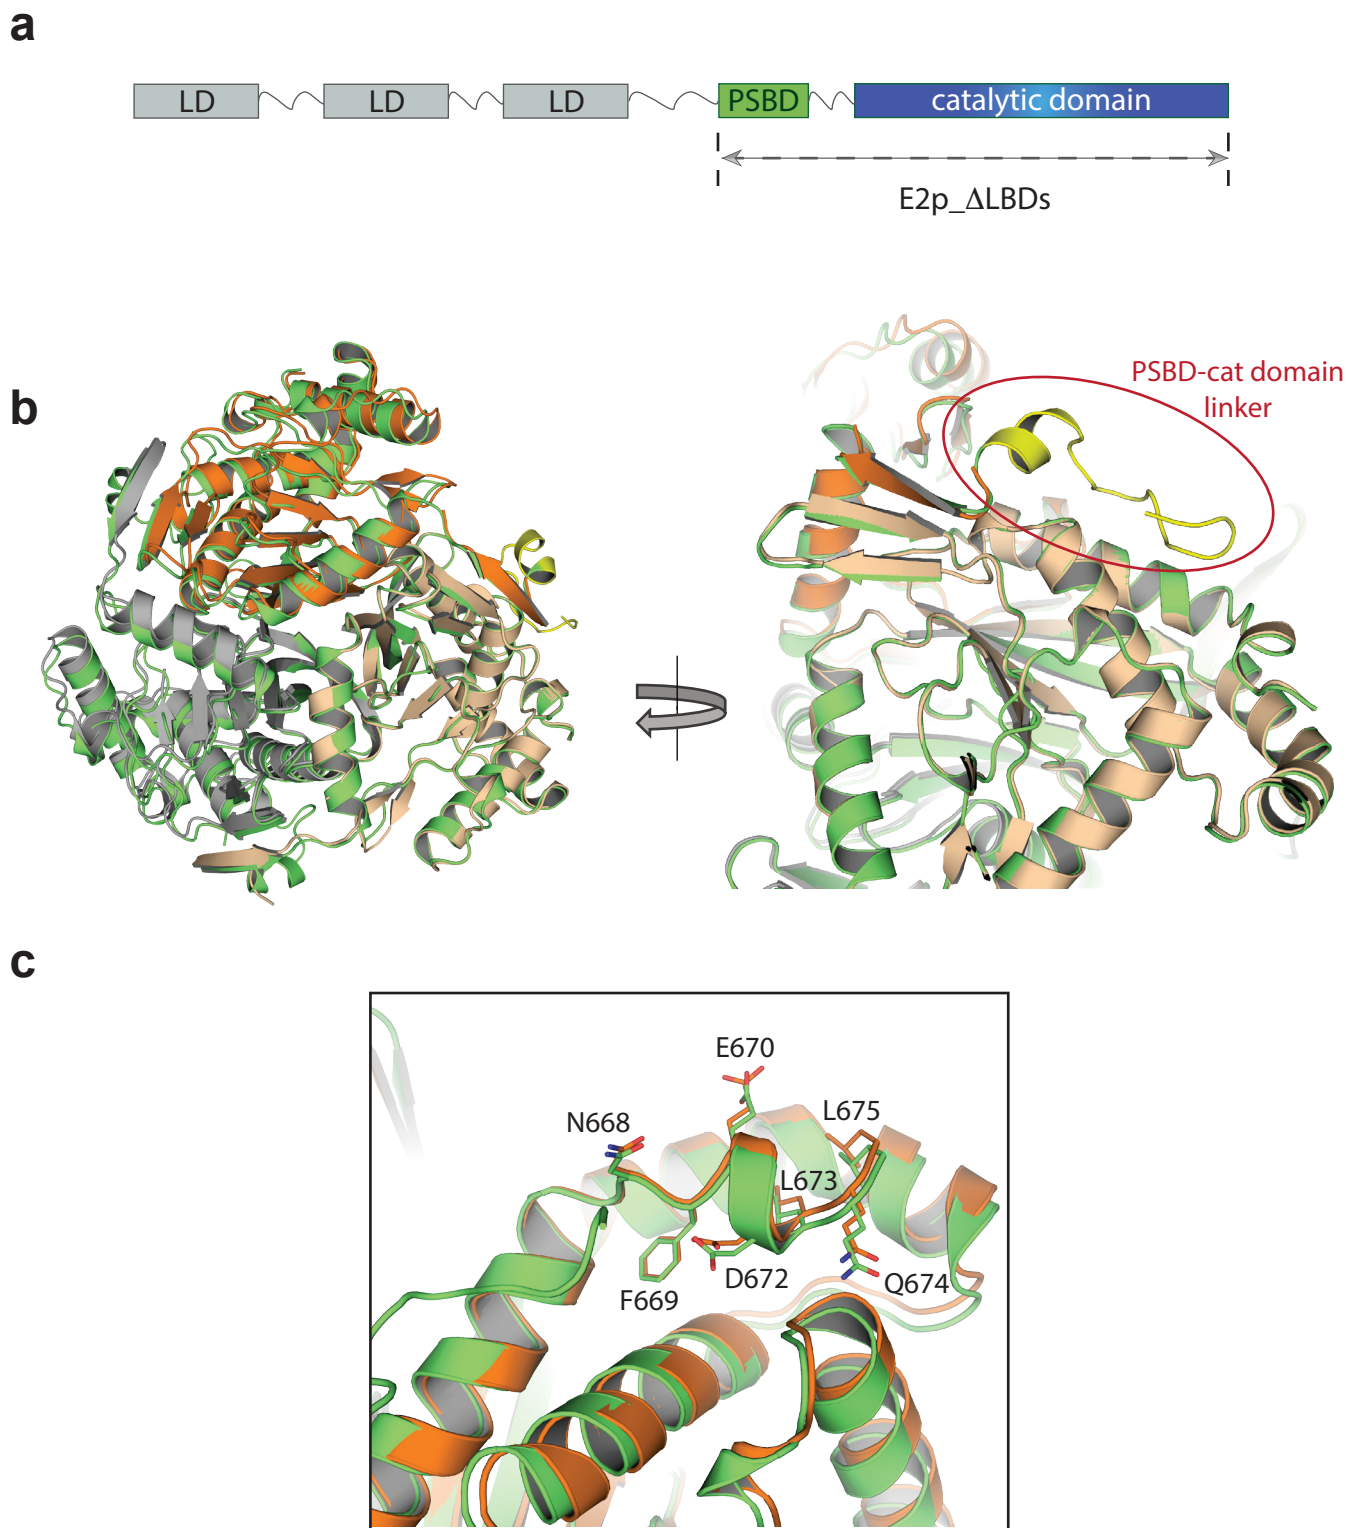

**Figure S7. Crystal structure of CgE2p\_ΔLBDs.**

**a)** Schematic representation of the domain architecture of CgE2p\_FL. The arrow indicates the region selected for CgE2p\_ΔLBDs construct. **b)** Front and sideview of the superposition of the structures from CgE2p\_CD (PDB 6ZZI) and CgE2p\_ΔLBDs (PDB 6ZZL), depicted in orange and green, respectively. In yellow, the linker connecting the catalytic domain to the PSBD domain. **c)** Zoomed view on the C-terminal  $\alpha$ -helix (TTI helix) showing the same conformation in both models.

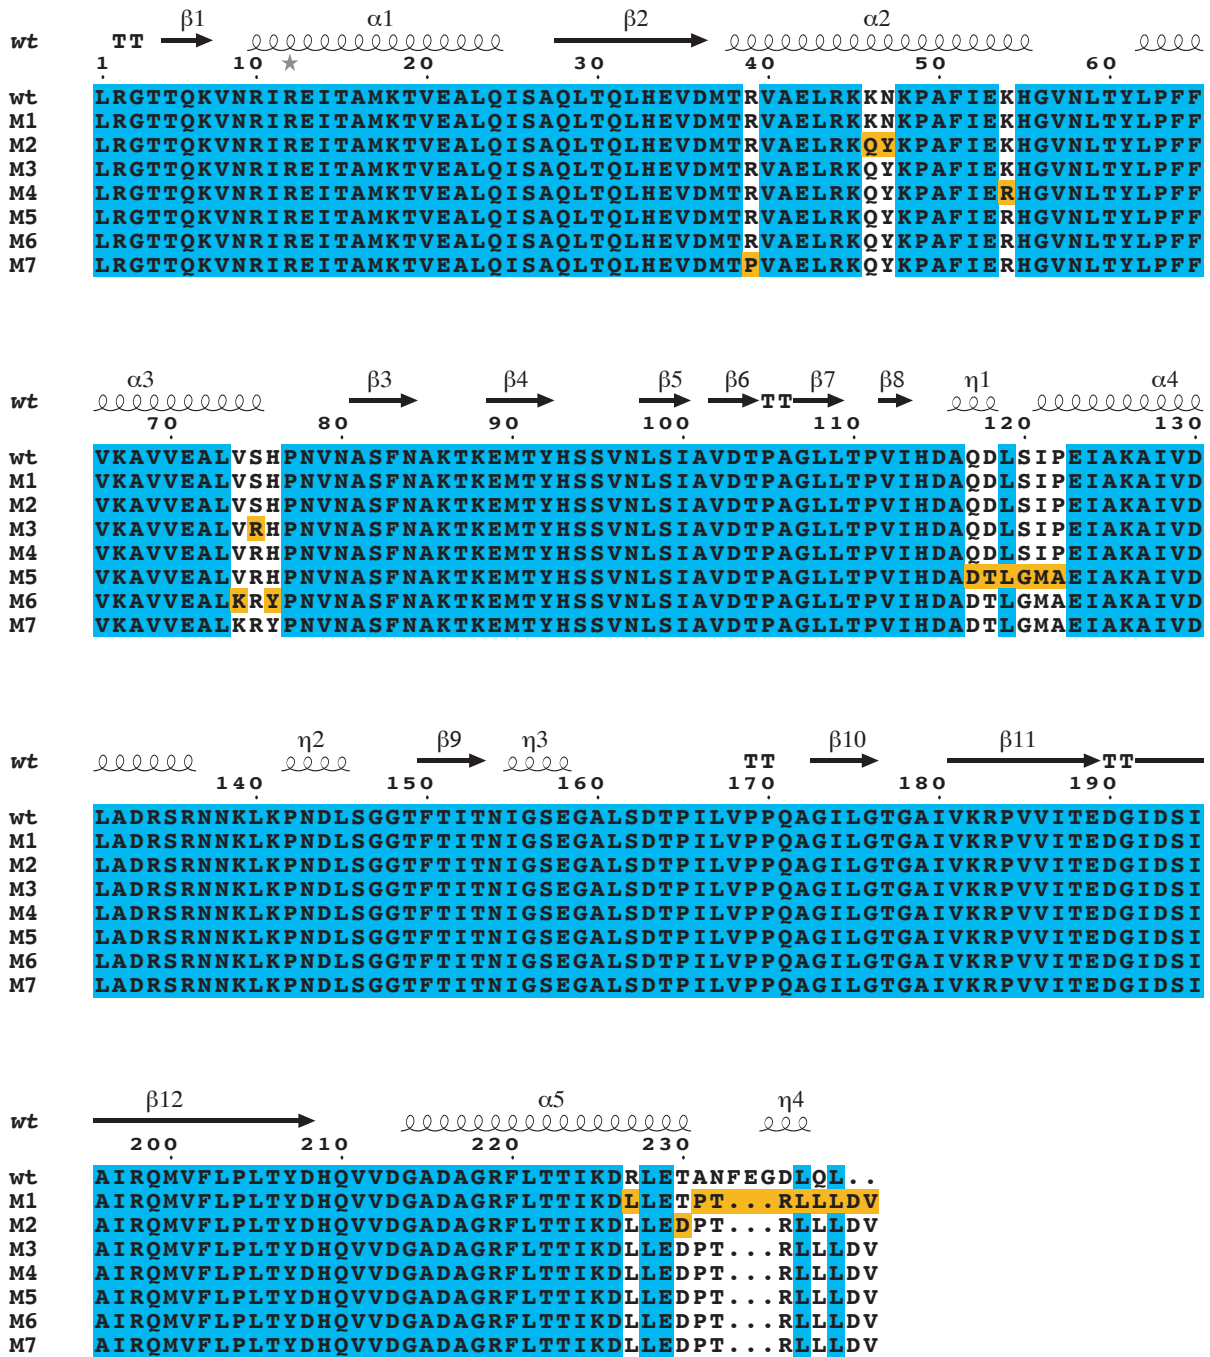

**Figure S8. CgE2p\_CD mutant series.**

Sequence alignment of the seven generated mutants of CgE2p\_CD to study the effect of amino acid substitutions on protein oligomerisation. Substitutions were introduced in an incremental way, with residues highlighted in orange representing the first introduction with respect to the wt sequence; each substitution was then maintained in the following mutants. Cyan: identical residues. Alignment performed by MAFFT (9) and not including the N-terminal His<sub>6</sub> and TEV cleavage site, present in all constructs; figure generated with ESPript3 (8) (<http://esript.ibcp.fr>).

**a**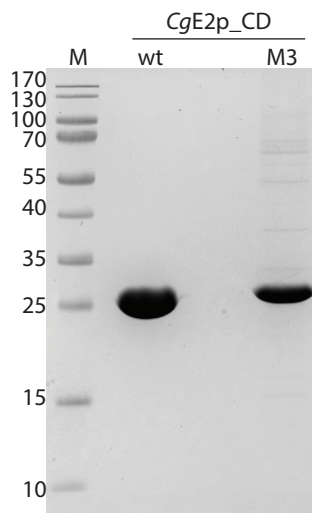**b**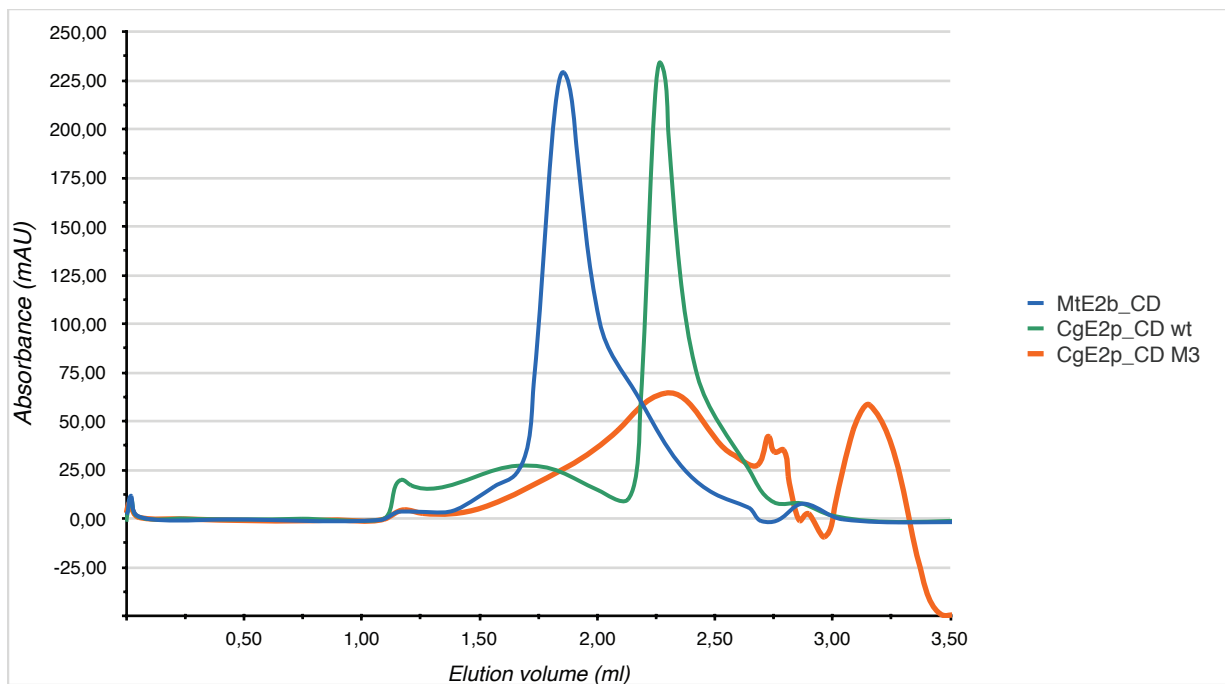

**Figure S9. Purification and size-exclusion chromatography profile of *CgE2p\_CD*, wild-type vs. mutant M3.**

**a)** SDS-PAGE of samples of purified wild-type *CgE2p\_CD* and its mutant version M3 (sequences provided in Suppl. Fig. 7). **b)** Representative size-exclusion chromatography profiles of *CgEp\_CD* wild-type (green curve) and mutant M3 (orange), superimposed to *MtE2b\_CD* (blue). Samples run on a Superose 6 increase 5/150 GL column (GE Healthcare).

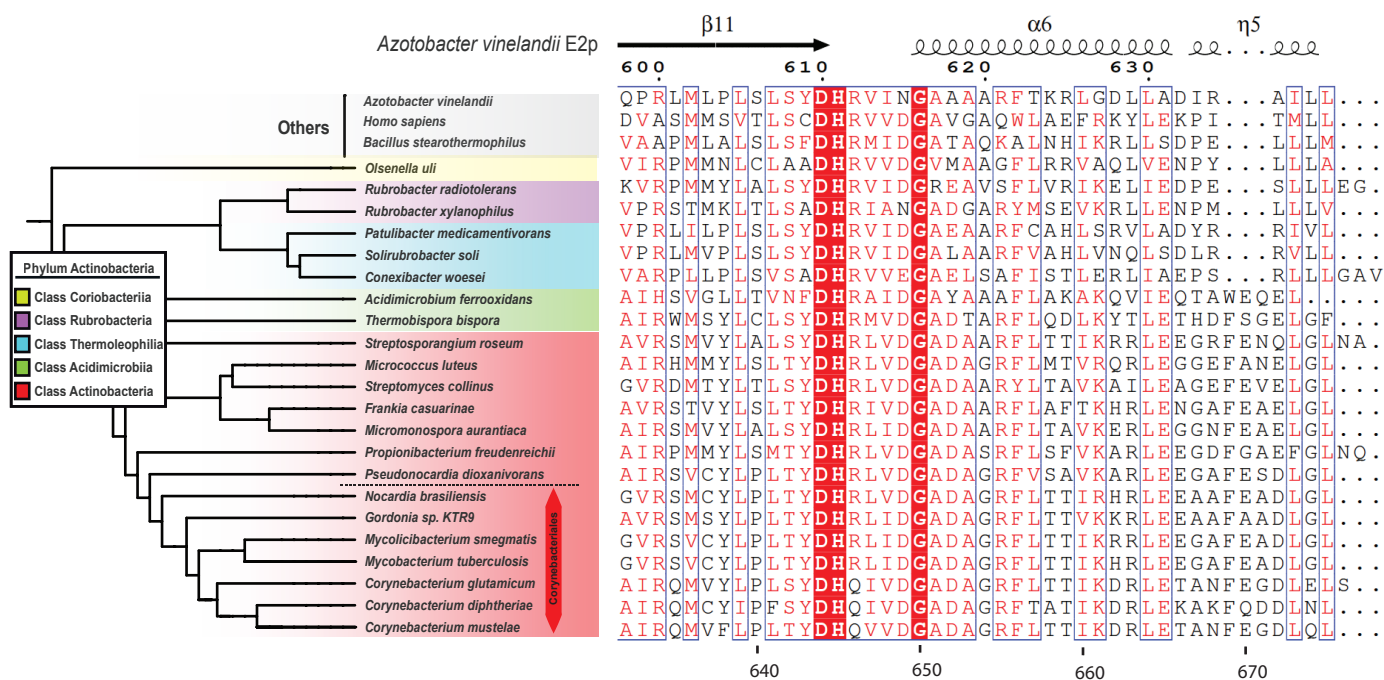

**Figure S10. Analysis of the PCI distribution within Actinobacteria.**

Sequence alignment of several E2 of known structure together with predicted E2 from species from the phylum Actinobacteria. Representative sequences from the phylum were selected to represent the 5 classes (Coriobacteriia, yellow; Rubrobacteria, violet; Thermoleophilia, cyan; Acidimicrobiia, yellow; Actinobacteria, red). Within the biggest classes (Actinobacteria and Actinomycetales), sequences selected represent different orders including the order *Corynebacteriales*, that include *M. tuberculosis* and *C. glutamicum*. The sequences were aligned using MUSCLE (10) and the presence of the PCI was analyzed in the region corresponding to the insertion observed in *CgE2p* and *MtE2p*. As a guide, secondary structure features and residue number of *AvE2p* were superimposed using ESPrpt3 (8) (<http://esprpt.ibcp.fr>).



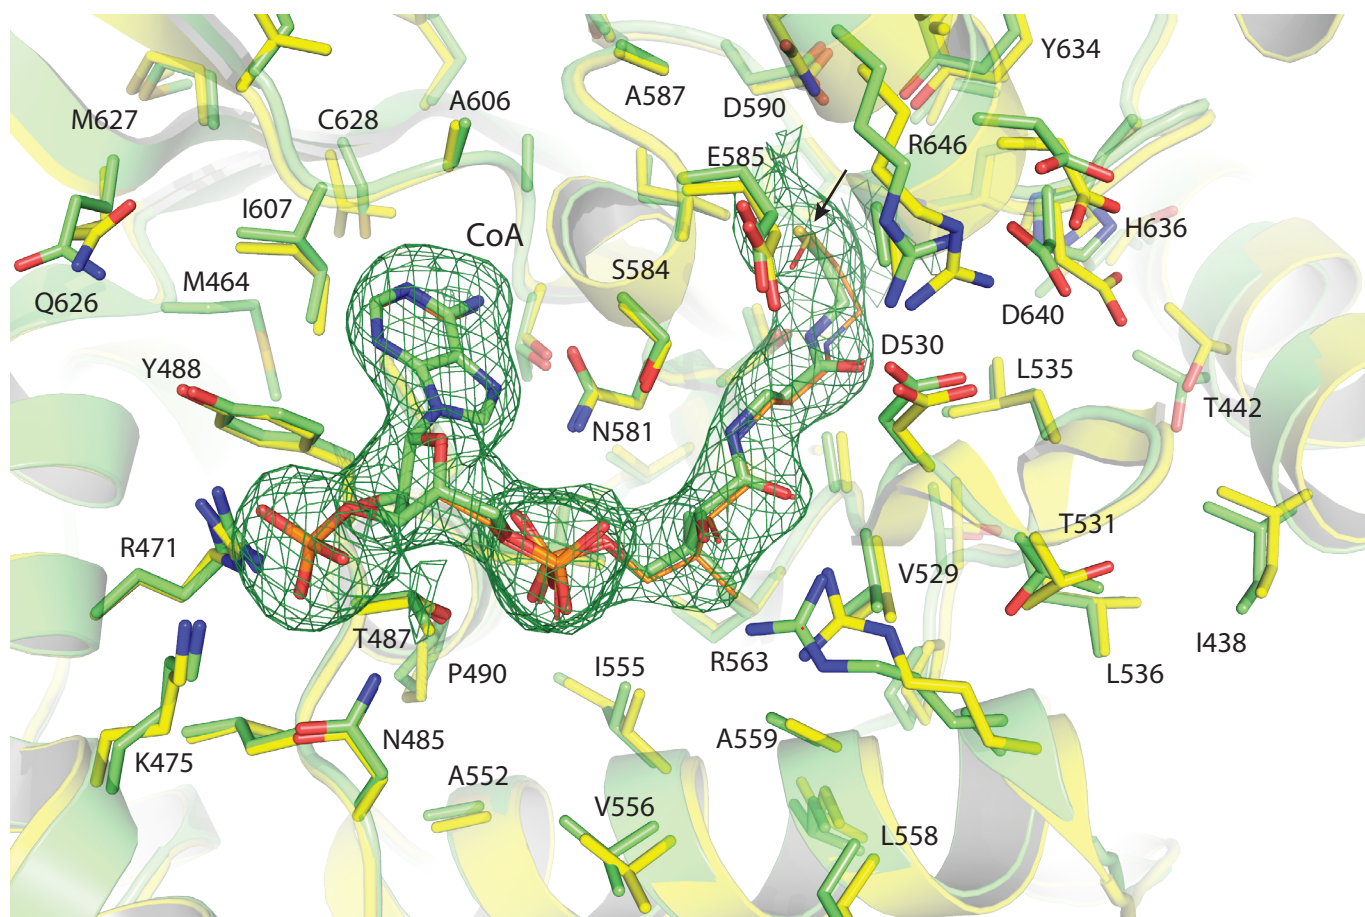

**Figure S11. Comparison of the active site pockets of *CmE2p\_CD* vs. *CgE2p\_CD*.**

Ribbon representation of *CmE2p\_CD* in complex with CoA (green, PDB 6ZZM), superimposed to *CgE2p\_CD* (yellow) in complex with oxidized CoA (thinner sticks, orange; PDB 6ZZJ). Side chains of residues in the active site environment are shown in sticks; numerotation refers to *CmE2p\_CD*. The bound CoA molecule shows the same '1N' conformation observed in *CgE2p\_CD*, including the peculiar, bent conformation of the terminal thiol group (black arrow). The green mesh represents the 'polder' omit electron density map (4) for the ligand, contoured at the  $4\sigma$  level.



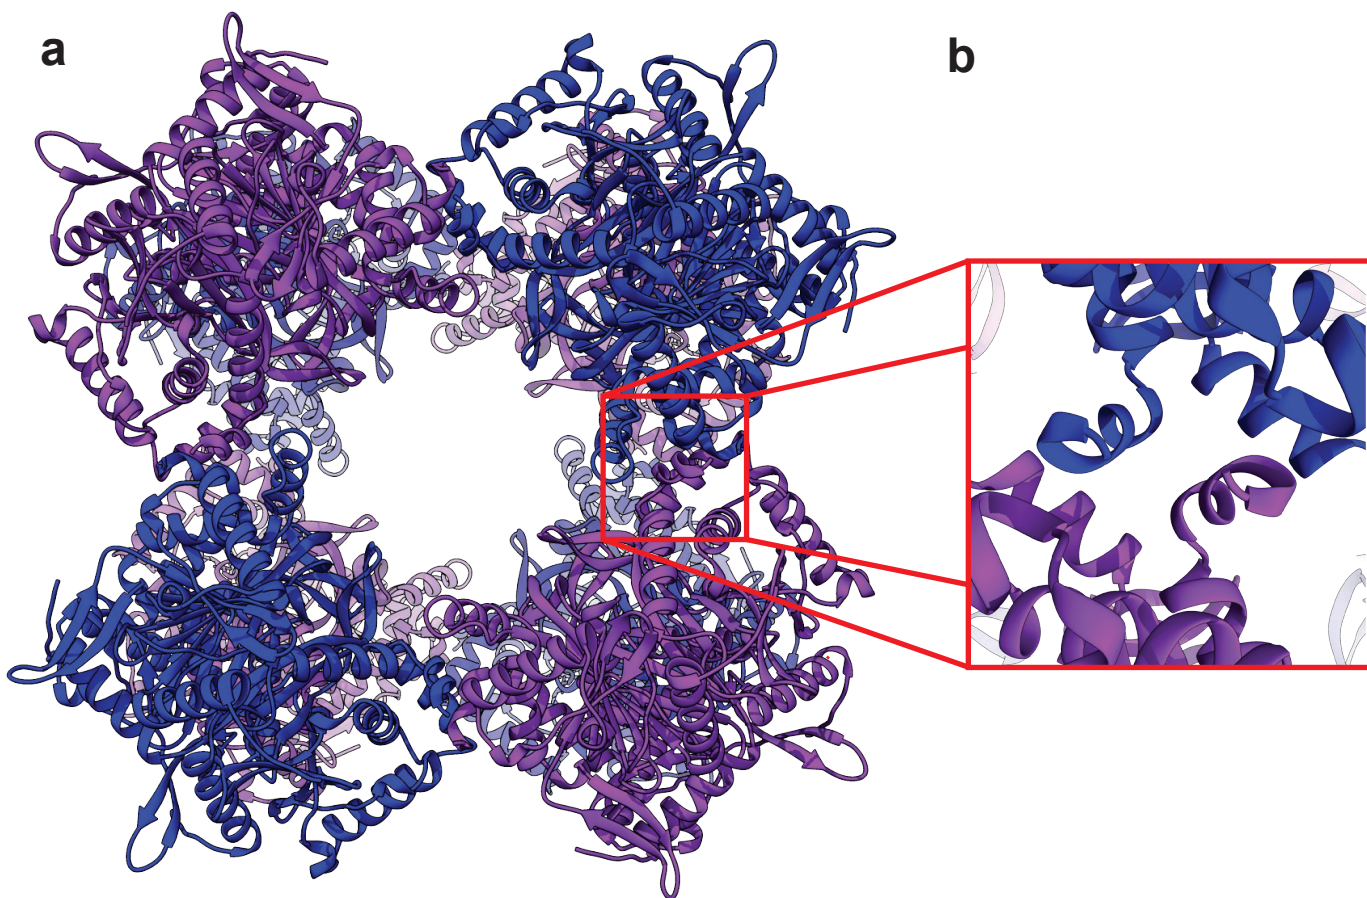

---

**Figure S12. Crystal structure of *MtE2b\_CD*.**

**a)** Ribbon representation of the 24-mer *MtE2b\_CD* assembly (PDB 6ZZN; this work). Protomers are related by crystallographic symmetry, the content of the asymmetric unit corresponding to a single *MtE2b\_CD* monomer (space group F 4 3 2). Eight trimers are positioned at the corners of the cube (alternating blue and violet colours). **b)** Zoomed view of the region corresponding to the inter-trimer interaction where the role of the TTI-helix, main determinant of the trimer-trimer interaction, is highlighted.

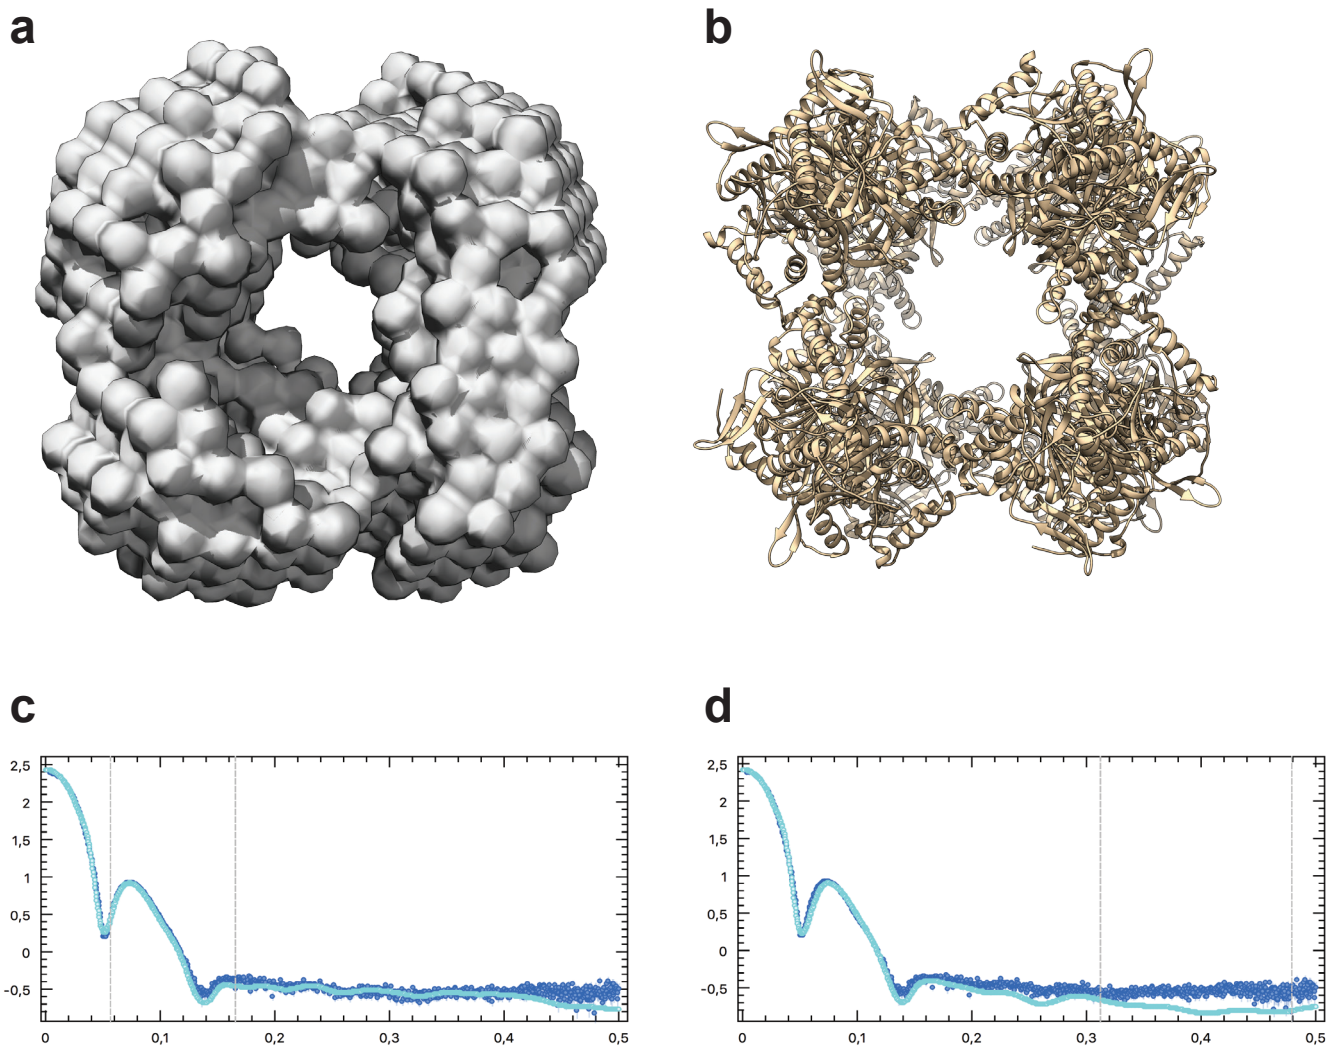

**Figure S13. *MtE2b\_CD* SAXS analysis.**

**a)** Front view from the DAMMIN (11) generated *ab-initio* model of *MtE2b\_CD* from the SAXS experimental data. **b)** Crystal structure of the same protein (PDB 6ZZN, this work; Suppl. Fig. 12). **c)** Experimental scattering intensity (blue dots) plotted and compared with the theoretical fit obtained for the DAMMIN model (cyan curve). **d)** Experimental (blue dots) and calculated scattering intensity (cyan) from the crystallographic model, obtained using CRY SOL (12).

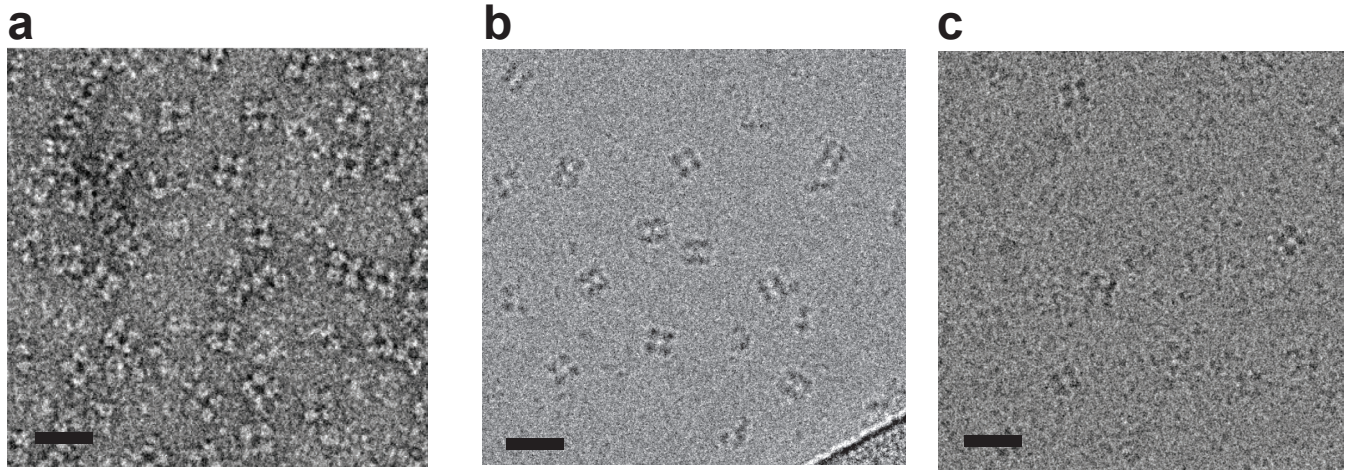

---

**Figure S14. Electron microscopy visualization of individual *MtE2b* particles.**

**a)** Negatively stained EM grid prepared using uranyl acetate as the staining agent, showing cubic particles of *MtE2b\_CD*. **(b,c)** - EM grid prepared in cryo condition showing cubic particles of *MtE2b\_CD* **(b)** and *MtE2b\_FL* **(c)**, respectively. The scale bar represents 20 nm in all cases.



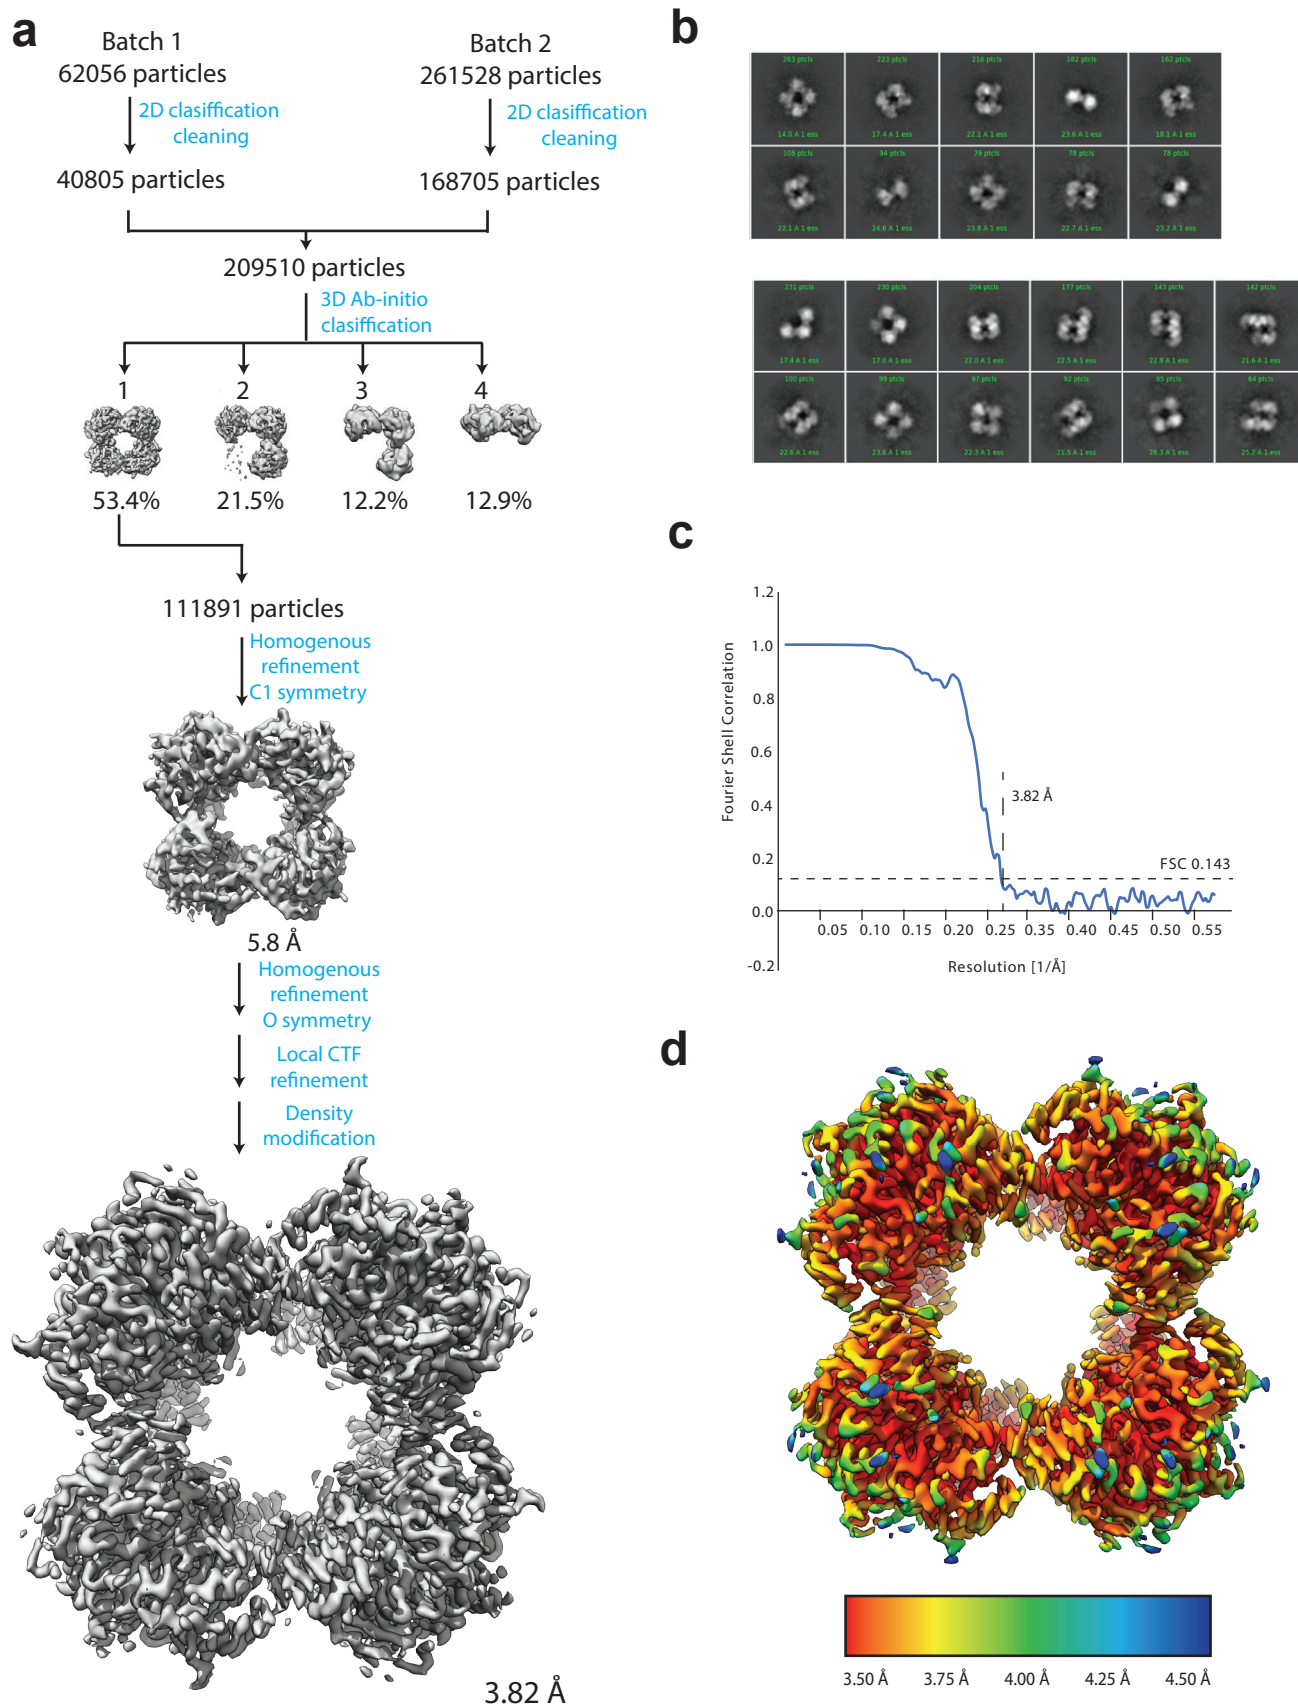

**Figure S15. Cryo-EM data analysis pipeline (*MtE2b\_CD*).**

**a)** Flow chart of the CryoEM data processing from 2D classification to the final model, performed with the Cryosparc software (13); final density modification was performed with the phenix suite (14). **b)** Representative 2D classes corresponding to model 4 (top) and models 2 and 3 (bottom). **c)** FSC plots and resolution estimation using the gold-standard 0.143 criterion. **d)** Final refined map colored according to local resolution calculated with the Blocres tool in Cryosparc (15).

**Table S1. SAXS data collection parameters.****Experimental settings**

| Beamline                                   | SOLEIL SWING          | ESRF BM29<br>(CgE2p_CD sample only) |
|--------------------------------------------|-----------------------|-------------------------------------|
| Detector                                   | CCD-based AVIEX       | Pilatus3 1M                         |
| Detector distance (m)                      | 2.000 / 4.000         | 2.867                               |
| Beam size ( $\mu\text{m}^2$ )              | $\sim 800 \times 150$ | $\sim 700 \times 700$               |
| Wavelength ( $\text{\AA}$ )                | 1.033                 | 0.992                               |
| s range ( $\text{\AA}^{-1}$ ) <sup>a</sup> | $0.0064 < s < 0.50$   | $0.034 < s < 0.50$                  |
| Exposure time/frame (s)                    | 1.5                   | 1.0                                 |
| Temperature (K)                            | 288                   | 293                                 |

**Structural parameters**

| Sample                                 | CgE2p_CD         | CgE2p_FL        | MtE2p_FL         | MtE2b_CD         | MtE2b_FL           |
|----------------------------------------|------------------|-----------------|------------------|------------------|--------------------|
| $R_g$ Guinier ( $\text{\AA}$ )         | $27.7 \pm 3.8$   | $88.9 \pm 2.53$ | $80.97 \pm 1.06$ | $62.11 \pm 1.85$ | $92.79 \pm 1.16$   |
| $I_{(0)}$ Guinier<br>(arbitrary units) | $12.38 \pm 0.58$ | $59 \pm 2.1$    | $0.13 \pm 0.006$ | $260.94 \pm 7.2$ | $0.086 \pm 0.0068$ |
| $R_g P(r)$ ( $\text{\AA}$ )            | 27.7             | 92.95           | 84.37            | 62.81            | 91.58              |
| $I_{(0)} P(r)$<br>(arbitrary units)    | 12.38            | 59              | 0.13             | 267              | 0.08               |
| $D_{\text{max}}$ ( $\text{\AA}$ )      | 84.7             | 334.74          | 308.91           | 159,04           | 308,72             |
| Vol                                    | 117250           | 578000          | 577000           | 1170000          | 3930000            |
| POROD ( $\text{\AA}^3$ )               |                  |                 |                  |                  |                    |
| MW Bayesian<br>(kDa)                   | 76.3             | 242.6           | 318.4            | 479.1            | 1178.4             |
| MW credibility<br>interval Bayesian    | 71.4-81.9        | 221.0-372.7     | 221.0-372.7      | 264.2-556.0      | 916.6-inf          |

Abbreviations: MW: Molecular weight;  $R_g$ : Radius of gyration;  $D_{\text{max}}$ : maximal particle dimension.

<sup>a</sup> Momentum transfer  $|s| = 4\pi\sin(\theta)/\lambda$

**Table S2.** Crystallographic data collection and refinement statistics (highest resolution shell in parenthesis). In the case of the CgE2p\_ΔLBDs dataset only, resolution limits were determined by applying an anisotropic cut-off by STARANISO, as implemented in the autoPROC data processing software (16).

| Data collection                                         | CgE2p_CD                      | CgE2p_CD<br>Ox-CoA complex    | CgE2p_CD<br>CoA/Lip(SH) <sub>2</sub><br>ternary complex | CgE2p_ΔLBDs                   | CmE2p_CD<br>CoA complex       | MtE2b_CD                      |
|---------------------------------------------------------|-------------------------------|-------------------------------|---------------------------------------------------------|-------------------------------|-------------------------------|-------------------------------|
| Synchrotron beamline                                    | SOLEIL Proxima 2A             | SOLEIL Proxima 1              | SOLEIL Proxima 1                                        | SOLEIL Proxima 1              | ESRF MASSIF-1                 | ESRF MASSIF-1                 |
| Wavelength (Å)                                          | 0.9801                        | 0.9801                        | 1.5498                                                  | 0.9786                        | 0.9660                        | 0.9660                        |
| Space group                                             | P3                            | P6 <sub>3</sub> 22            | P2 <sub>1</sub> 3                                       | P6 <sub>4</sub>               | P6 <sub>3</sub> 22            | F432                          |
| Cell dimensions<br><i>a</i> , <i>b</i> , <i>c</i> (Å)   | 158.28, 158.28, 63.02         | 73.74, 73.74, 192.19          | 132.13, 132.13, 132.13                                  | 170.39, 170.39, 67.56         | 100.62, 100.62,<br>281.57     | 214.07, 214.07,<br>214.07     |
| $\alpha$ , $\beta$ , $\gamma$ (°)                       | 90, 90, 120                   | 90, 90, 120                   | 90, 90, 90                                              | 90, 90, 120                   | 90, 90, 120                   | 90, 90, 90                    |
| Resolution (Å)                                          | 79.14 – 1.93<br>(1.96 – 1.93) | 48.05 – 1.35<br>(1.37 – 1.35) | 93.43 – 2.09<br>(2.13 – 2.09)                           | 85.20 – 2.23<br>(2.37 – 2.23) | 47.38 – 2.50<br>(2.60 – 2.50) | 49.11 – 1.50<br>(1.53 – 1.50) |
| <i>R</i> <sub>pim</sub>                                 | 0.043 (0.369)                 | 0.020 (0.545)                 | 0.028 (0.334)                                           | 0.027 (0.484)                 | 0.028 (0.487)                 | 0.023 (0.391)                 |
| <i>I</i> / $\sigma$ ( <i>I</i> )                        | 14.0 (2.2)                    | 16.1 (1.1)                    | 16.6 (2.2)                                              | 16.0 (1.5)                    | 18.7 (1.7)                    | 14.9 (1.9)                    |
| Completeness (%)                                        | 99.3 (100.0)                  | 99.6 (92.8)                   | 100.0 (100.0)                                           | 95.0 (74.8)                   | 100.0 (100.0)                 | 100.0 (100.0)                 |
| CC(1/2)                                                 | 0.998 (0.736)                 | 0.998 (0.844)                 | 0.999 (0.797)                                           | 0.999 (0.629)                 | 0.999 (0.593)                 | 0.999 (0.748)                 |
| Multiplicity                                            | 3.8 (3.8)                     | 25.0 (21.2)                   | 19.2 (19.1)                                             | 20.6 (15.9)                   | 19.0 (19.6)                   | 17.2 (17.4)                   |
| <b>Refinement</b>                                       |                               |                               |                                                         |                               |                               |                               |
| Resolution (Å)                                          | 1.93                          | 1.35                          | 2.09                                                    | 2.23                          | 2.50                          | 1.50                          |
| No. reflections                                         | 131357                        | 68431                         | 45719                                                   | 40014                         | 30177                         | 67274                         |
| <i>R</i> <sub>work</sub> / <i>R</i> <sub>free</sub> (%) | 16.6 / 18.5                   | 16.8 / 19.4                   | 16.4 / 17.2                                             | 19.0 / 21.3                   | 20.1 / 22.0                   | 19.0 / 19.3                   |
| No. atoms                                               |                               |                               |                                                         |                               |                               |                               |
| Protein                                                 | 10944                         | 1830                          | 3659                                                    | 5721                          | 3617                          | 1668                          |
| Ligands/ions                                            | -                             | 64                            | 108                                                     | 17                            | 96                            | 13                            |
| Solvent                                                 | 1257                          | 300                           | 320                                                     | 308                           | 131                           | 337                           |
| Average B-factors                                       |                               |                               |                                                         |                               |                               |                               |
| Protein                                                 | 29.5                          | 23.4                          | 42.2                                                    | 63.6                          | 69.0                          | 26.4                          |
| Ligand/ions                                             | -                             | 25.3                          | 51.5                                                    | 81.4                          | 66.1                          | 25.3                          |
| Solvent                                                 | 38.2                          | 38.8                          | 51.6                                                    | 58.8                          | 64.8                          | 40.4                          |
| R.m.s deviations                                        |                               |                               |                                                         |                               |                               |                               |
| Bond lengths (Å)                                        | 0.008                         | 0.010                         | 0.008                                                   | 0.008                         | 0.008                         | 0.008                         |
| Bond angles (°)                                         | 0.91                          | 1.04                          | 0.91                                                    | 0.96                          | 0.91                          | 0.93                          |
| <b>PDB entry code</b>                                   | <b>6ZZI</b>                   | <b>6ZZJ</b>                   | <b>6ZZK</b>                                             | <b>6ZZL</b>                   | <b>6ZZM</b>                   | <b>6ZZN</b>                   |

**Table S3.** Number of genomes with identified *odhA*-like genes and total number of available genomes analyzed. To identify OdhA-like predicted proteins, the following pfam domain accession no. were searched: PF00198, PF16078, PF00676, PF16870, PF02779 (<http://pfam.xfam.org/>). JGI: Joint Genome Institute, USA (genome online database available at <https://gold.jgi.doe.gov/>).

| <i>Superkingdom /<br/>Phylum</i>            | <b>Number of finished<br/>genomes in JGI<br/>databases</b> | <b>Number of<br/>genomes with<br/><i>odhA</i>-like genes</b> | <b>Percentage of<br/>genomes with <i>odhA</i>-<br/>like genes</b> |
|---------------------------------------------|------------------------------------------------------------|--------------------------------------------------------------|-------------------------------------------------------------------|
| <i>Archaea</i>                              | 173                                                        | 0                                                            | 0                                                                 |
| <i>Eukaryota</i>                            | 37                                                         | 0                                                            | 0                                                                 |
| <i>Bacteria<br/>(except Actinobacteria)</i> | 2957                                                       | 9                                                            | 0,3%                                                              |
| <i>Actinobacteria</i>                       | 356                                                        | 280                                                          | 78,6%                                                             |

**Table S4.** Autoinduction temperatures and purification buffers employed for the purification of the recombinant proteins used in this study.

| <b>Sample</b>      | <b>Induction temperature</b> | <b>Lysis buffer</b>                                              | <b>Gel filtration buffer</b>                    |
|--------------------|------------------------------|------------------------------------------------------------------|-------------------------------------------------|
| <i>CgE2p_FL</i>    | 18 °C                        | 50 mM Tris-HCl pH 8.5, 500 mM NaCl, 1 mM DTT                     | 50 mM Tris-HCl pH 8.5, 150 mM NaCl, 5% glycerol |
| <i>CgE2p_CD</i>    | 18 °C                        | 50 mM Tris-HCl pH 8.5, 500 mM NaCl, 1 mM DTT                     | 50 mM Tris-HCl pH 8.5, 150 mM NaCl, 5% glycerol |
| <i>CgE2p_ΔLBDs</i> | 18 °C                        | 25 mM Tris-HCl pH 8.5, 300 mM NaCl, 25 mM imidazole              | 50 mM Tris-HCl pH 8.5, 150 mM NaCl, 5% glycerol |
| <i>MtE2p_FL</i>    | 30 °C                        | 25 mM Tris-HCl pH 8.5, 300 mM NaCl, 25 mM imidazole, 5% glycerol | 25 mM Tris-HCl pH 8.5, 150 mM NaCl, 5% glycerol |
| <i>MtE2b_FL</i>    | 30 °C                        | 25 mM Tris-HCl pH 8.5, 300 mM NaCl, 25 mM imidazole, 5% glycerol | 25 mM Tris-HCl pH 8.5, 150 mM NaCl, 5% glycerol |
| <i>MtE2b_CD</i>    | 18 °C                        | 25 mM Tris-HCl pH 8.5, 50 mM NaCl                                | 25 mM Tris-HCl pH 8.5, 50 mM NaCl               |



## SI References

1. E. R. Hall, P. D. Weitzman, A continuous spectrophotometric assay for the transacylase (E2) component of pyruvate and alpha-oxoglutarate dehydrogenase enzyme complexes. *Anal. Biochem.* **62**, 286–290 (1974).
2. J. Trewhella, *et al.*, 2017 publication guidelines for structural modelling of small-angle scattering data from biomolecules in solution: an update. *Acta Crystallogr. D Struct. Biol.* **73**, 710–728 (2017).
3. T. Bizien, *et al.*, A Brief Survey of State-of-the-Art BioSAXS. *Protein Pept. Lett.* **23**, 217–231 (2016).
4. D. Liebschner, *et al.*, Polder maps: improving OMIT maps by excluding bulk solvent. *Acta Crystallogr. D Struct. Biol.* **73**, 148–157 (2017).
5. A. Mattevi, G. Obmolova, K. H. Kalk, A. Teplyakov, W. G. J. Hol, Crystallographic Analysis of Substrate Binding and Catalysis in Dihydrolipoyl Transacetylase (E2p). *Biochemistry* **32**, 3887–3901 (1993).
6. E. Krissinel, K. Henrick, Inference of macromolecular assemblies from crystalline state. *J. Mol. Biol.* **372**, 774–797 (2007).
7. A. Waterhouse, *et al.* SWISS-MODEL: homology modelling of protein structures and complexes. *Nucleic Acids Res.* **46**, W296–W303 (2018).
8. X. Robert, P. Gouet, Deciphering key features in protein structures with the new ENDscript server. *Nucleic Acids Res.* **42**, W320–4 (2014).
9. K. Katoh, D. M. Standley, MAFFT multiple sequence alignment software version 7: Improvements in performance and usability. *Mol. Biol. Evol.* **30**, 772–780 (2013).
10. R. C. Edgar, MUSCLE: multiple sequence alignment with high accuracy and high throughput. *Nucleic Acids Res.* **32**, 1792–1797 (2004).
11. D. I. Svergun, Restoring low resolution structure of biological macromolecules from solution scattering using simulated annealing. *Biophys. J.* **76**, 2879–2886 (1999).
12. D. Franke, *et al.*, ATSAS 2.8: a comprehensive data analysis suite for small-angle scattering from macromolecular solutions. *J. Appl. Crystallogr.* **50**, 1212–1225 (2017).
13. A. Punjani, J. L. Rubinstein, D. J. Fleet, M. A. Brubaker, cryoSPARC: algorithms for rapid unsupervised cryo-EM structure determination. *Nat. Methods* **14**, 290–296 (2017).
14. T. C. Terwilliger, S. J. Ludtke, R. J. Read, P. D. Adams, P. V. Afonine, Improvement of cryo-EM maps by density modification. *Nat. Methods* **17**, 923–927 (2020).
15. G. Cardone, J. B. Heymann, A. C. Steven, One number does not fit all: mapping local variations in resolution in cryo-EM reconstructions. *J. Struct. Biol.* **184**, 226–236 (2013).
16. C. Vonrhein, *et al.*, Data processing and analysis with the autoPROC toolbox. *Acta Crystallogr. D Biol. Crystallogr.* **67**, 293–302 (2011).
